# Supplementary material for: Oxygen vacancy redistribution and ferroelectric polarization relaxation on epitaxial perovskite films during an electrocatalytic process
Source: Royal Society of Chemistry journal article supplement (doi:10.1039/d3ta07815a), 2024-01-01
Supplement: d3ta07815a1.pdf [file d3ta07815a1.pdf]

## Supplementary Information

### **Oxygen vacancy redistribution and ferroelectric polarization relaxation on epitaxial perovskite film during the electrocatalytic process**

Keyu An<sup>1</sup>, Zhichao Yu<sup>1</sup>, Haoyun Bai<sup>1</sup>, Di Liu<sup>1</sup>, Lulu Qiao<sup>1</sup>, Xingshuai Lv<sup>1</sup>, Lianyi Shao<sup>1</sup>, Jinxian Feng<sup>1</sup>, Youpeng Cao<sup>1</sup>, Lun Li<sup>1</sup>, Zhaorui Wen<sup>1</sup>, Shi Chen<sup>1</sup>, Zhongbin Pan<sup>2</sup>, Shuangpeng Wang<sup>1\*</sup>, Hui Pan<sup>1,3\*</sup>

<sup>1</sup>Institute of Applied Physics and Materials Engineering, University of Macau, Macao SAR 999078, China

<sup>2</sup>School of Materials Science and Chemical Engineering, Ningbo University, Ningbo, Zhejiang, 315211, China

<sup>3</sup>Department of Physics and Chemistry, Faculty of Science and Technology, University of Macau, Macao SAR 999078, China

\*Corresponding Authors

Shuangpeng Wang: [spwang@um.edu.mo](mailto:spwang@um.edu.mo)

Hui Pan: [huipan@um.edu.mo](mailto:huipan@um.edu.mo)

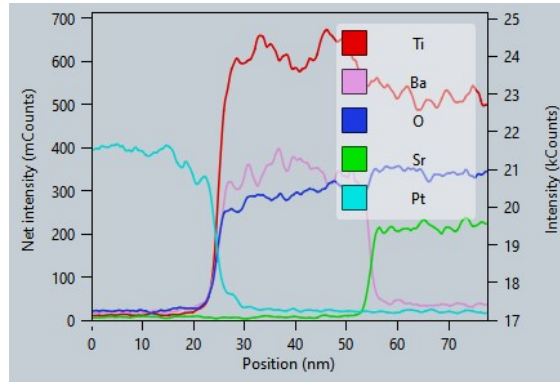

Figure S1. The EDS line scan of STO/BTO/Pt film.

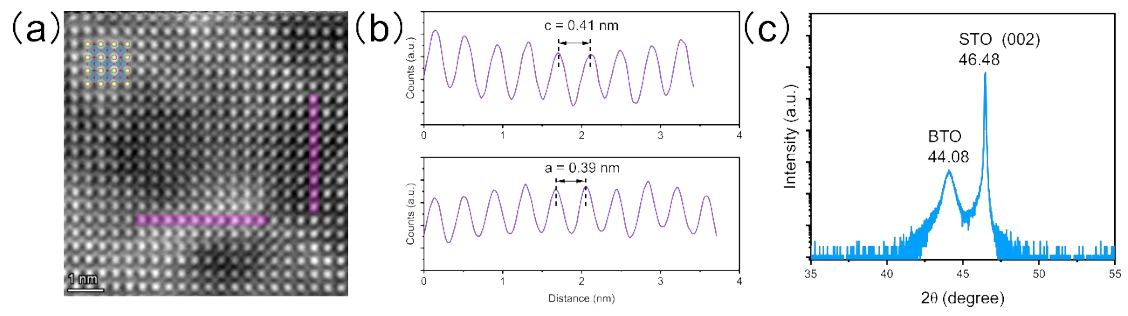

Figure S2. Lattice parameters of epitaxial BTO film. (a) Gaussian filter-corrected HAADF-STEM image. (b) The corresponding intensity profiles in the vertical and horizontal directions in (a). (c) The  $2\theta$ - $\omega$  XRD scan.

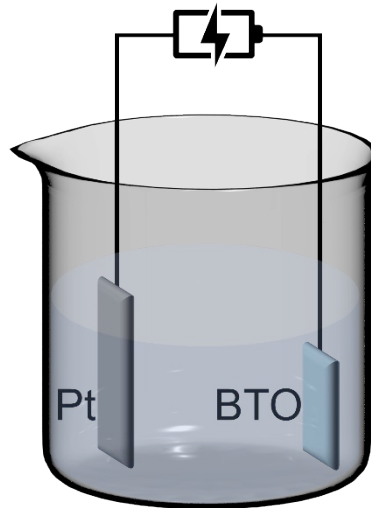

Figure S3. Illustration of ferroelectric polarization with an electrochemical method. When the positive bias is applied to BTO, the ferroelectric polarization of BTO is positive, otherwise, negative.

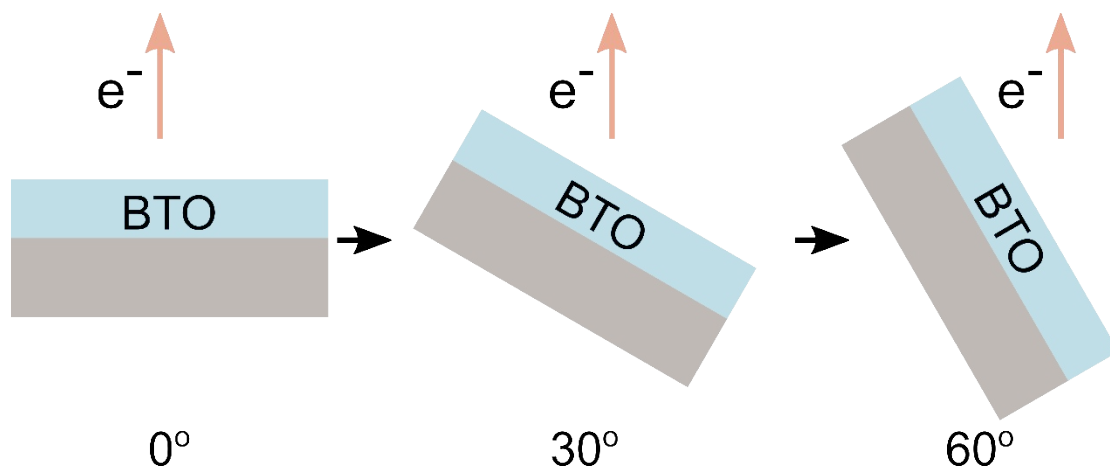

Figure S4. Illustration of AR-XPS with a tilt angle from  $0^\circ$  to  $60^\circ$ .

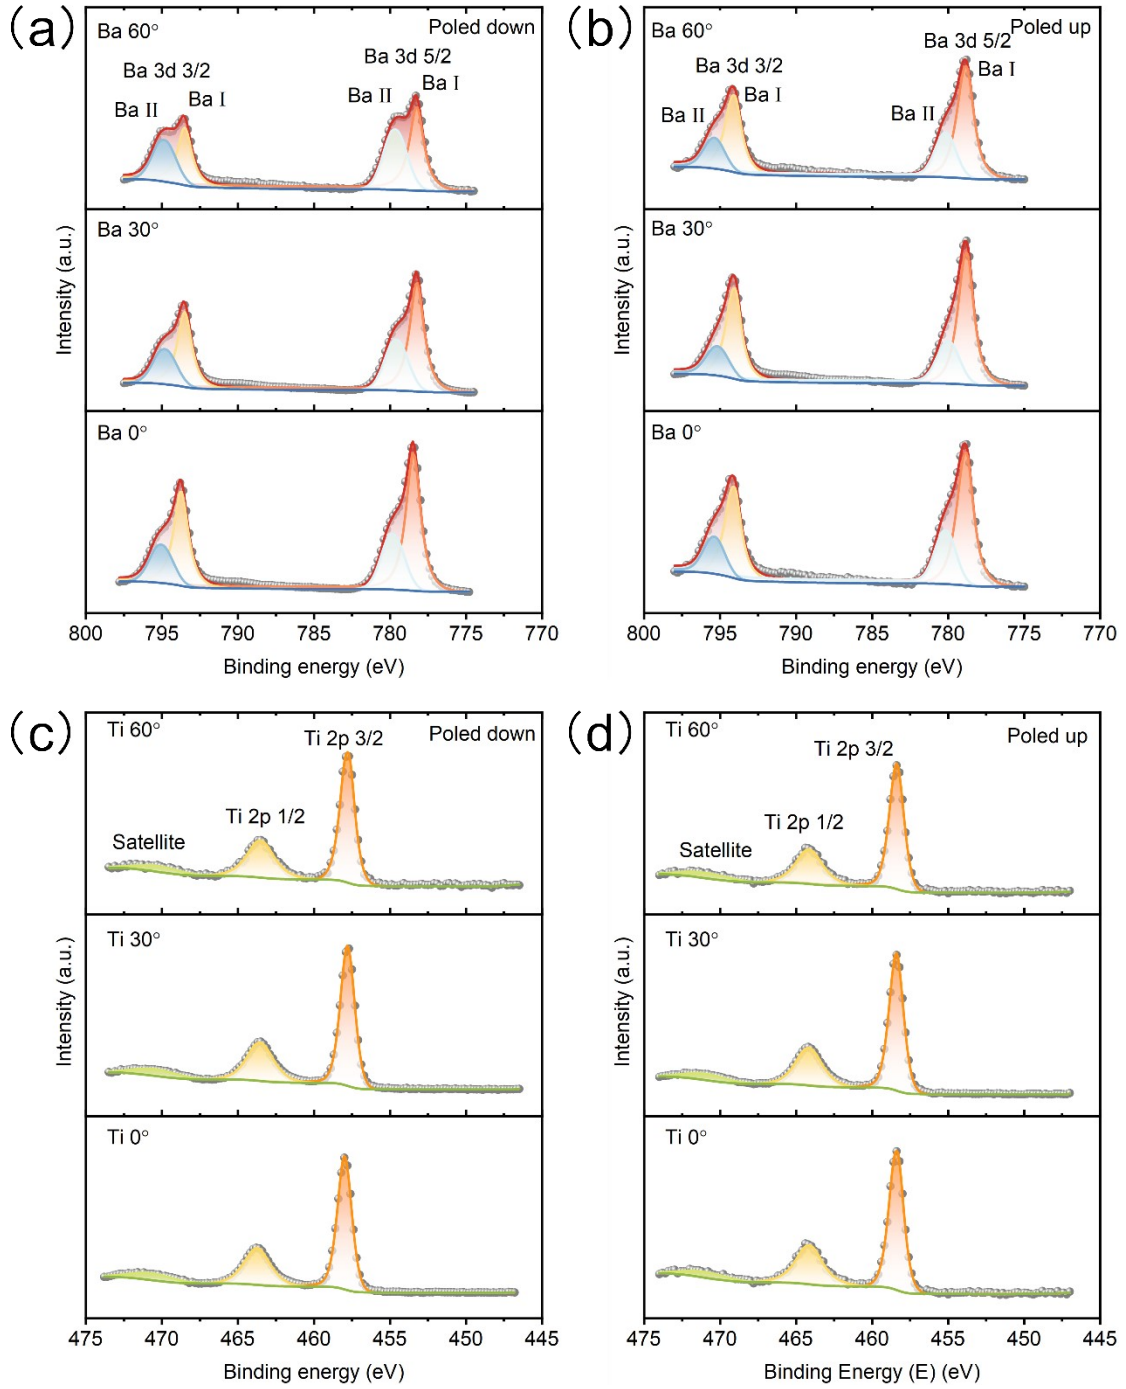

Figure S5. AR-XPS measurements of BTO film. Ba 3d high-resolution XPS spectra after poled down (a) and poled up (b). Ti 2p high-resolution XPS spectra after poled down (c) and poled up (d).

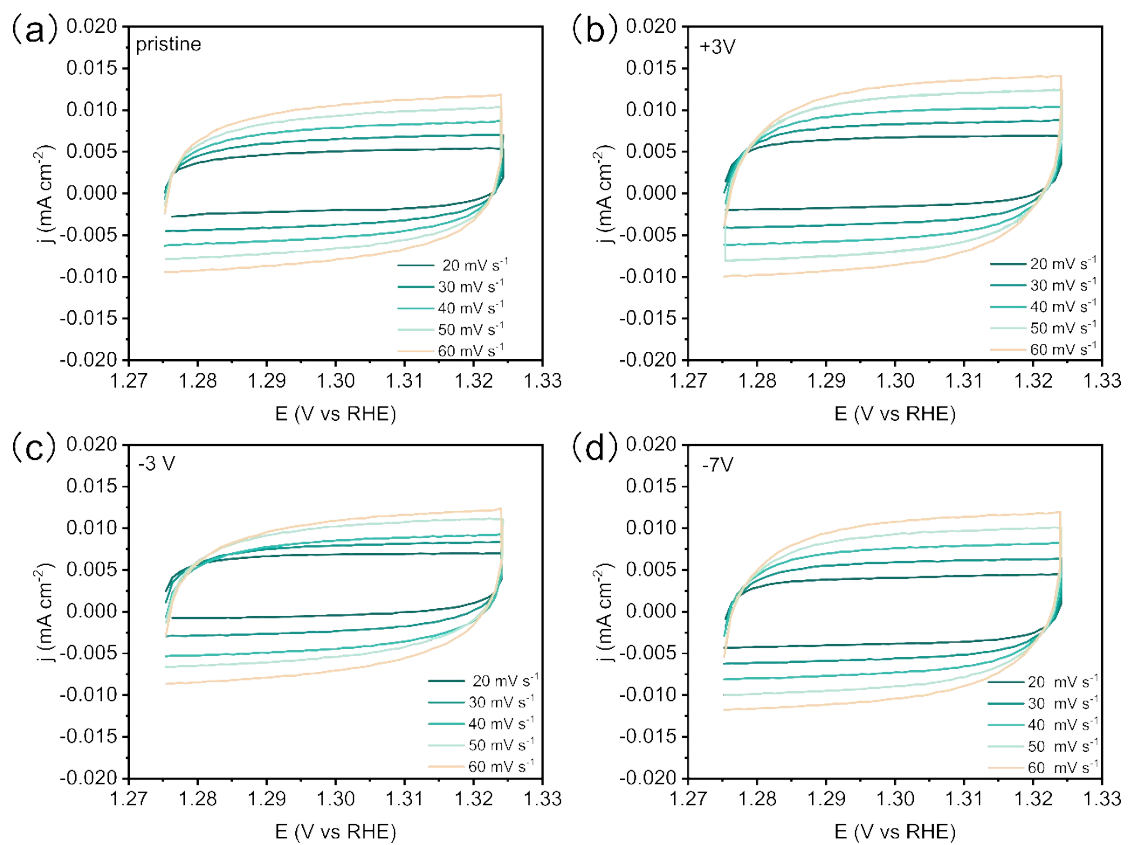

Figure S6. CV tests under different scan rates: (a) pristine BTO film, (b) +3V poled-up BTO film, (c) -3V, and (d) -7V poled-down BTO film.

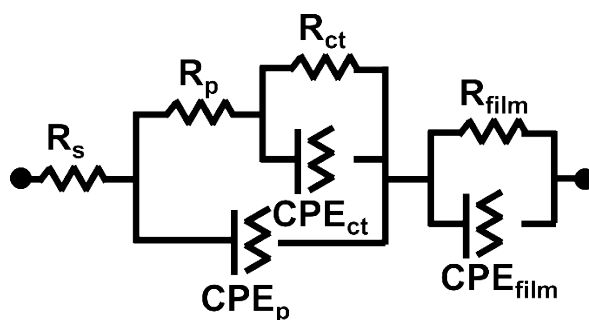

Figure S7. Equivalent circuit for modeling the measured EIS. This model considers the dielectric property more suitable for the ferroelectric film system<sup>1,2</sup>.  $R_s$  is the solution resistance.  $R_p$  and  $R_{ct}$  refer to the resistance of adsorption and the interfacial charge transfer.  $CPE_{ct}$  and  $CPE_p$  represent the relaxation of the charge associated with the adsorbed intermediate and the double-layer capacitance, respectively.  $R_{film}$  and  $CPE_{film}$  model the resistance and dielectric properties of BTO film, respectively.



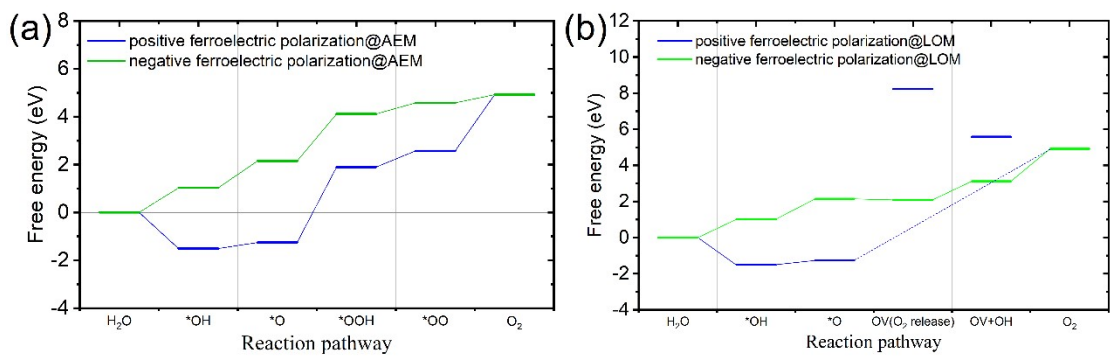

Figure S8. Free energy profile of OER over positive and negative ferroelectric polarization with adsorbate evolution mechanism (AEM) (a) and lattice oxygen mechanism (LOM) (b).

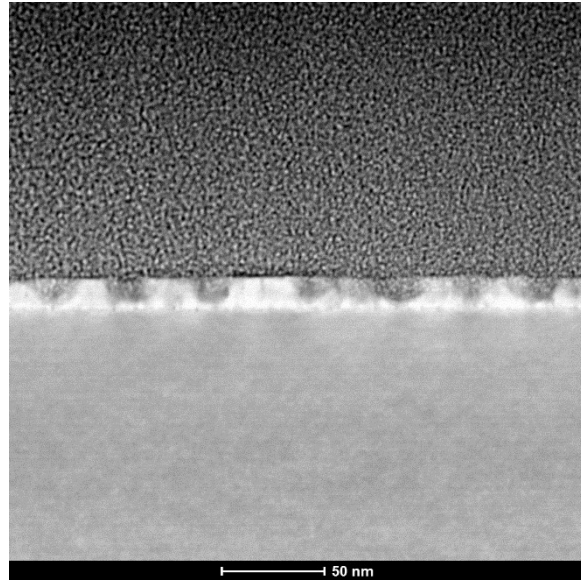

Figure S9. TEM image of BTO film after long time OER performance.

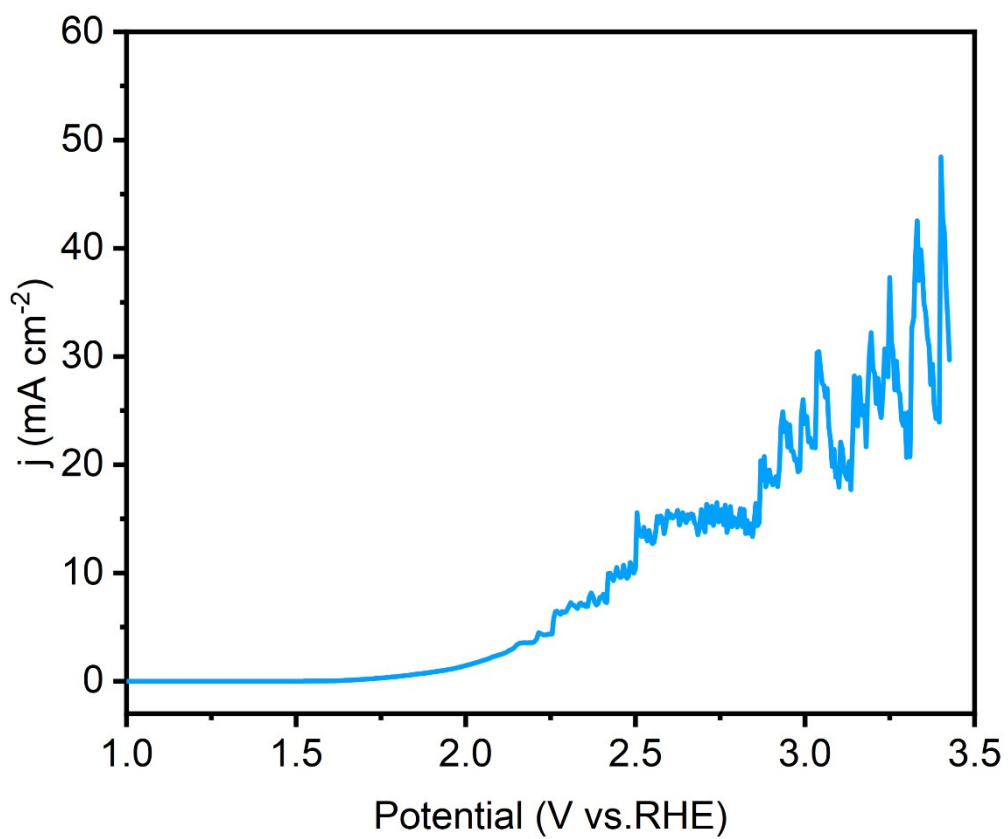

Figure S10. LSV of BTO film within a large range of potential.

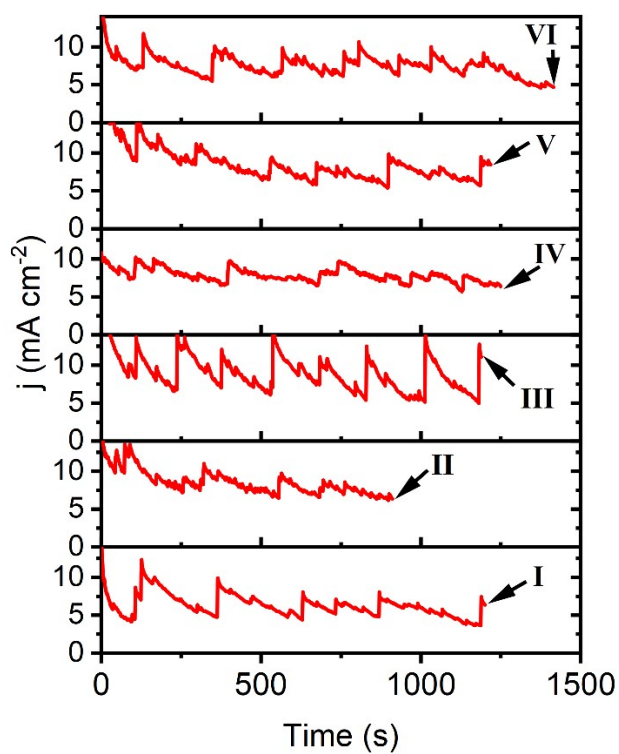

Figure S11. CA response of BTO film stopped at different times under 2.262 V (vs. RHE). I, III, and V for the highest current density, while II, IV, and VI for lowest current density.

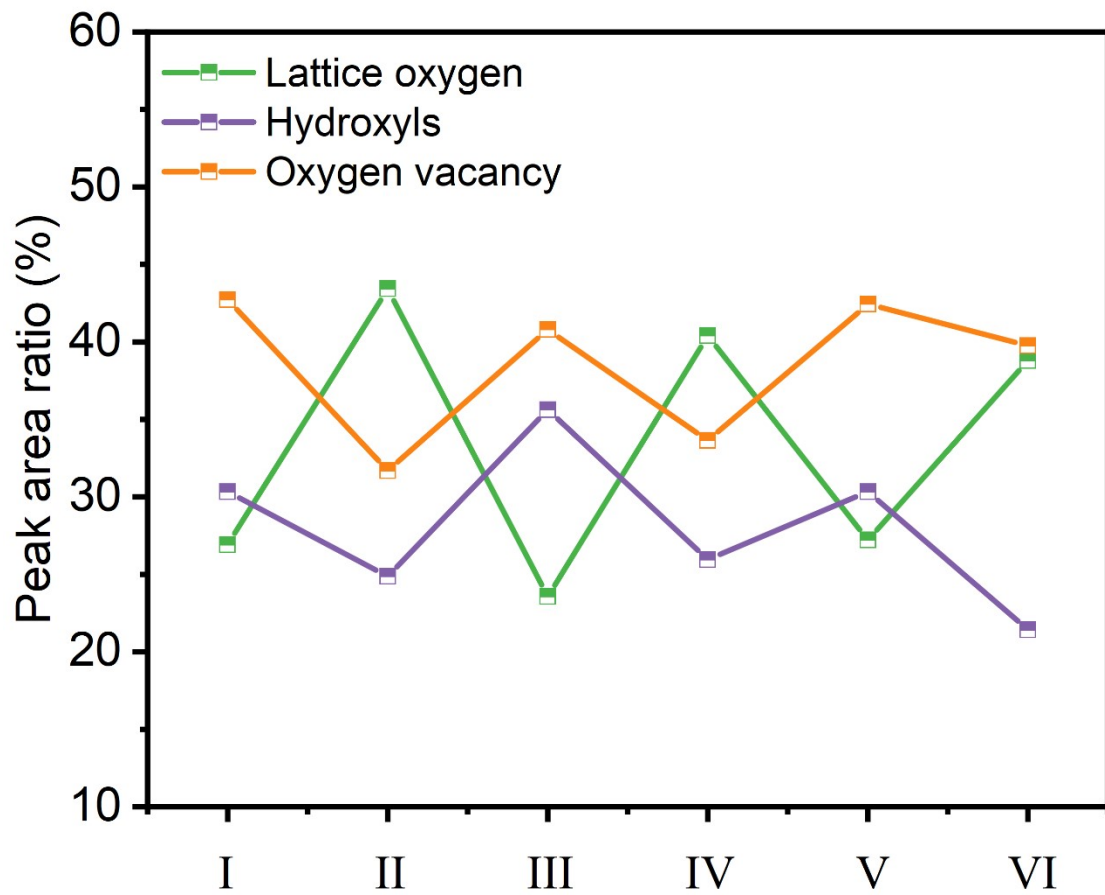

Figure S12. Evolution of lattice oxygen, hydroxyls, and oxygen vacancy of BTO film at different points on the CA curve.

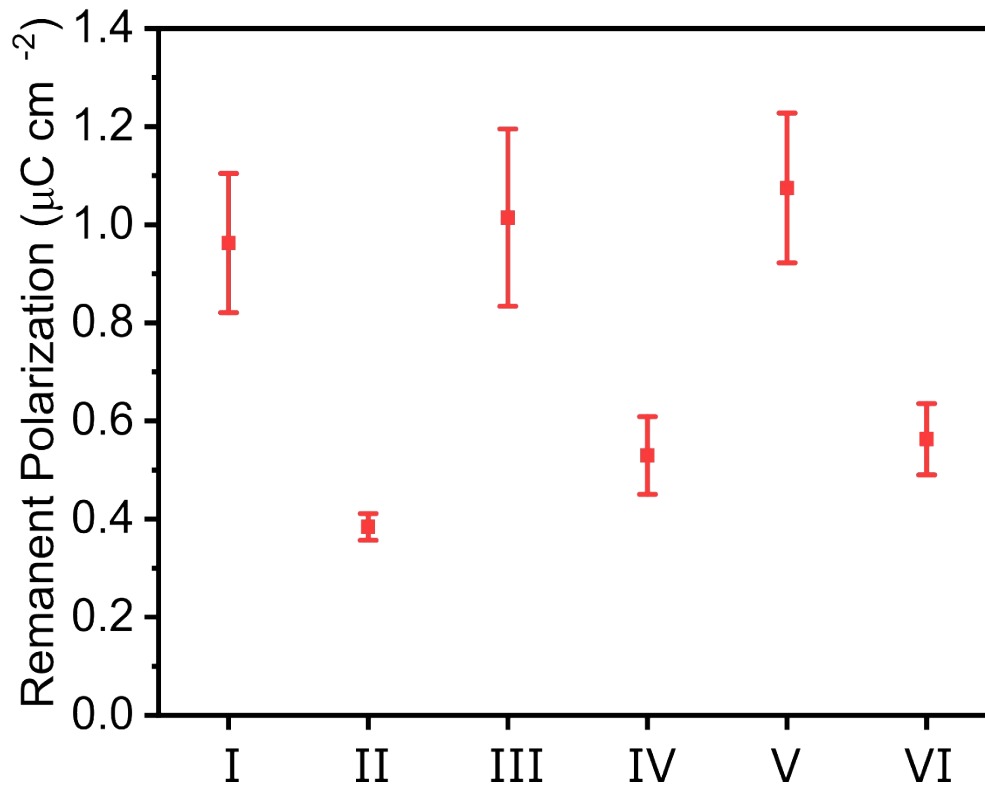

Figure S13. Remanent polarization extracted from P-E loops.

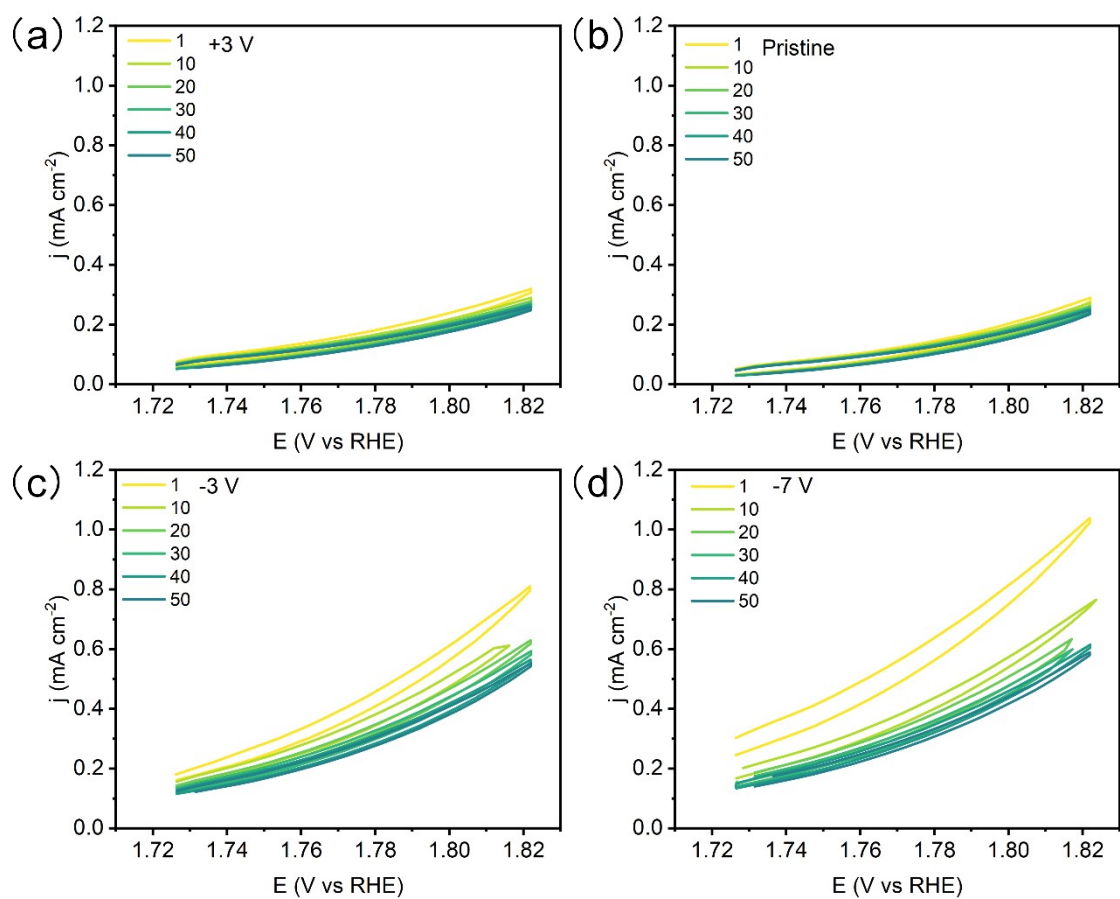

Figure S14. Time dependent CV test of BTO film with different ferroelectric polarization. The number is the circle of CV tests.

Table S1. Parameters of EIS fitting data for BTO film with different ferroelectric polarizations.

|          | $R_p$        | $R_{ct}$     | $CPE_{ct}$ | $CPE_p$ | $R_{film}$   | $CPE_{film}$ |
|----------|--------------|--------------|------------|---------|--------------|--------------|
|          | ( $\Omega$ ) | ( $\Omega$ ) | (mF)       | (mF)    | ( $\Omega$ ) | (mF)         |
| +3V      | 12           | 2156         | 0.06       | 0.0055  | 221          | 0.14         |
| pristine | 13           | 1195         | 0.08       | 0.01    | 512          | 0.16         |
| -3V      | 4            | 984          | 0.11       | 0.0002  | 226          | 0.12         |
| -7V      | 22           | 32           | 0.12       | 0.0029  | 366          | 0.12         |



Table S2. Comparison of OER performance of BTO film with other ferroelectric film catalysts.

| Electrocatalysts                                                                                             | Tafel<br>(mv dec <sup>-1</sup> ) | Overpotential<br>(10 mA cm <sup>-2</sup> ) | Reference                                                       |
|--------------------------------------------------------------------------------------------------------------|----------------------------------|--------------------------------------------|-----------------------------------------------------------------|
| BaTiO <sub>3</sub>                                                                                           | 90                               |                                            | This work                                                       |
| K <sub>0.4</sub> Sr <sub>0.4</sub> Ba <sub>0.4</sub> Nb <sub>1.7</sub> Co <sub>0.3</sub> O <sub>6-δ</sub>    |                                  | 40                                         | Advanced Functional Materials, 2023, 33(6): 2210194.            |
| Bi <sub>5</sub> CoTi <sub>3</sub> O <sub>15</sub> with in-situ BiCoO <sub>3</sub>                            | 320                              | 34                                         | Nature communications, 2019, 10(1): 1409.                       |
| SrIrO <sub>3</sub> /Pb(Mg <sub>1/3</sub> Nb <sub>2/3</sub> ) <sub>0.7</sub> Ti <sub>0.3</sub> O <sub>3</sub> | 83.5                             | 316                                        | Physical Chemistry Chemical Physics, 2023, 25(36): 24976-24984. |

## Supplementary References

- 1 Z. Xiao, Y. C. Huang, C. L. Dong, C. Xie, Z. Liu, S. Du, W. Chen, D. Yan, L. Tao, Z. Shu, G. Zhang, H. Duan, Y. Wang, Y. Zou, R. Chen, S. Wang, *J Am Chem Soc* 2020, 142, 12087.
- 2 M. E. G. Lyons, M. P. Brandon, *Journal of Electroanalytical Chemistry* 2009, 631, 62.
